# Supplementary material for: Pericyte-mediated constriction of renal capillaries evokes no-reflow and kidney injury following ischaemia
Source: eLife. 2022 Mar 14;11:e74211. doi: 10.7554/eLife.74211 (PMC8947765; doi:10.7554/eLife.74211)
Supplement: Figure 1—figure supplement 1—source data 1. [file elife-74211-fig1-figsupp1-data1.xlsx]

## Sheet: Fig 1a,b
(Min)	MEDULLA - CONT			MEDULLA- ISCH			CORTEX - CONT			CORTEX - ISCH
-10	1.01453	0.0337611	N=3	1.05639	0.0315199	N=3	0.984897	0.0328125	N=3	1.04139	0.0308505	N=3
-9	1.00893	0.0367106	N=3	0.959212	0.0472123	N=3	1.04291	0.00749445	N=3	0.970773	0.0274938	N=3
-8	1.00144	0.0589432	N=3	0.954534	0.00965274	N=3	1.00308	0.0345005	N=3	1.02551	0.0181467	N=3
-7	1.00922	0.0430868	N=3	1.00486	0.0425674	N=3	1.05494	0.0260085	N=3	0.986247	0.0202182	N=3
-6	1.0432	0.0580777	N=3	1.05069	0.089031	N=3	1.02676	0.0462035	N=3	0.984287	0.0281082	N=3
-5	0.980297	0.0190151	N=3	0.941971	0.00358712	N=3	1.05078	0.070408	N=3	0.972157	0.0330795	N=3
-4	1.01556	0.0549324	N=3	0.935417	0.0296903	N=3	1.08614	0.079202	N=3	0.991864	0.0545081	N=3
-3	1.04554	0.0821687	N=3	0.780782	0.236465	N=3	1.07364	0.0738355	N=3	0.956707	0.0530748	N=3
-2	0.977125	0.0496057	N=3	0.608484	0.30464	N=3	1.06782	0.0684445	N=3	0.997863	0.0656393	N=3
-1	0.995137	0.0232213	N=3	0.649929	0.2811	N=3	1.07063	0.0816815	N=3	0.912977	0.0330506	N=3
0	0.967853	0.0283784	N=3	0.402293	0.284847	N=3	1.11512	0.0710955	N=3	0.646565	0.193449	N=3
1	1.0036	0.0523082	N=3	0.032051	0.017975	N=3	1.11723	0.065877	N=3	0.352232	0.113994	N=3
2	1.00082	0.0455892	N=3	0.044386	0.00815599	N=3	1.1307	0.0570975	N=3	0.04924	0.04924	N=3
3	1.05147	0.0316393	N=3	0.054075	0.0128845	N=3	1.14933	0.046918	N=3	0.0927473	0.0340575	N=3
4	0.987214	0.0541068	N=3	0.0347223	0.00941724	N=3	1.15457	0.04235	N=3	0.0735757	0.0632835	N=3
5	0.97614	0.0221867	N=3	0.047825	0.0172961	N=3	1.09078	0.093381	N=3	0.127899	0.0869676	N=3
6	1.11784	0.0637725	N=3	0.0981207	0.0634391	N=3	1.11783	0.0520225	N=3	0.107947	0.0880985	N=3
7	1.09404	0.093071	N=3	0.0862017	0.0545424	N=3	1.17734	0.07982	N=3	0.107946	0.0761535	N=3
8	1.05993	0.0906948	N=3	0.096609	0.0491509	N=3	1.14816	0.0919235	N=3	0.0934737	0.0711852	N=3
9	1.10865	0.0987491	N=3	0.0672893	0.0285272	N=3	1.05574	0.011712	N=3	0.0935433	0.0686951	N=3
10	1.09036	0.0613057	N=3	0.085598	0.0555694	N=3	1.03592	0.0154355	N=3	0.086687	0.0638463	N=3
11	1.12098	0.0677498	N=3	0.0610927	0.0320946	N=3	1.0637	0.00990999	N=3	0.0872457	0.0629795	N=3
12	1.06124	0.100592	N=3	0.0559007	0.0259207	N=3	1.05655	0.045861	N=3	0.0884727	0.0648792	N=3
13	1.00002	0.101604	N=3	0.0569917	0.0248188	N=3	1.05742	0.054798	N=3	0.088575	0.0654265	N=3
14	1.04532	0.0805061	N=3	0.0726247	0.019676	N=3	1.00683	0.0094265	N=3	0.0806923	0.0561476	N=3
15	1.12377	0.093628	N=3	0.0717183	0.0238513	N=3	1.03867	0.0271325	N=3	0.081599	0.056008	N=3
16	1.10906	0.0870645	N=3	0.0603157	0.0360128	N=3	1.08804	0.00947899	N=3	0.0748933	0.0487827	N=3
17	0.998817	0.123505	N=3	0.046906	0.0198627	N=3	1.04714	0.00909954	N=3	0.072778	0.045857	N=3
18	1.08225	0.0478979	N=3	0.0541267	0.0280423	N=3	1.04743	0.02002	N=3	0.077007	0.0499602	N=3
19	1.15228	0.042939	N=3	0.042902	0.0161364	N=3	1.05233	0.031847	N=3	0.0695993	0.0433597	N=3
20	1.07657	0.0476735	N=3	0.0679233	0.026822	N=3	1.04492	0.00886554	N=3	0.075407	0.0483323	N=3
21	1.04926	0.053372	N=3	0.078442	0.02804	N=3	0.993679	0.017008	N=3	0.0705323	0.0455455	N=3
22	1.01603	0.0105386	N=3	0.0495437	0.0200731	N=3	1.02634	0.023717	N=3	0.060742	0.0359689	N=3
23	1.08538	0.0597775	N=3	0.0625427	0.0211618	N=3	1.02482	0.00856948	N=3	0.0646517	0.0386401	N=3
24	1.07679	0.010607	N=3	0.0584377	0.0332112	N=3	1.0127	0.00115854	N=3	0.0628743	0.0368281	N=3
25	1.03249	0.0458562	N=3	0.0685	0.0238473	N=3	1.04123	0.037332	N=3	0.0632383	0.0363116	N=3
26	1.0502	0.0118161	N=3	0.0664777	0.0173724	N=3	1.01513	0.022905	N=3	0.0631223	0.0355646	N=3
27	1.10093	0.058843	N=3	0.058572	0.021658	N=3	1.01573	0.011675	N=3	0.063729	0.0357868	N=3
28	1.04312	0.0113124	N=3	0.0625917	0.0225346	N=3	1.04937	0.034814	N=3	0.0589783	0.0319248	N=3
29	1.01614	0.020425	N=3	0.0559887	0.0307115	N=3	1.0308	0.00525099	N=3	0.058882	0.0318116	N=3
30	1.02705	0.0203213	N=3	0.0543573	0.0286051	N=3	0.999954	0.023283	N=3	0.0598657	0.0318963	N=3
31	1.0066	0.00471737	N=3	0.058104	0.0297156	N=3	1.04465	0.00490302	N=3	0.0520153	0.0246741	N=3
32	1.02268	0.00862052	N=3	0.0589907	0.0302353	N=3	1.05535	0.0267715	N=3	0.0565263	0.0291286	N=3
33	1.08067	0.0404258	N=3	0.057148	0.0339468	N=3	1.0555	0.012704	N=3	0.06906	0.0401126	N=3
34	1.0284	0.0321156	N=3	0.046653	0.0220666	N=3	0.973741	0.0223785	N=3	0.0608443	0.0331589	N=3
35	0.932469	0.100081	N=3	0.0447253	0.0219241	N=3	0.993041	0.0305	N=3	0.058121	0.0294684	N=3
36	1.0557	0.0283	N=3	0.0456087	0.0222776	N=3	0.994703	0.0397815	N=3	0.049337	0.0216494	N=3
37	1.0601	0.0241	N=3	0.03997	0.0171702	N=3	0.970402	0.0425055	N=3	0.0382477	0.0121788	N=3
38	1.00655	0.02955	N=3	0.0394413	0.0169563	N=3	0.967649	0.0445925	N=3	0.0300183	0.00551385	N=3
39	1.01335	0.03665	N=3	0.0392853	0.0171297	N=3	0.947704	0.00851452	N=3	0.026115	0.00449407	N=3
40	1.04155	0.00854999	N=3	0.0475873	0.0245997	N=3	1.05522	0.0997155	N=3	0.0256873	0.0046046	N=3
41	1.0237	0.0097	N=3	0.0630553	0.026301	N=3	1.06145	0.112297	N=3	0.0201563	0.00788979	N=3
42	1.00895	0.00495005	N=3	0.105784	0.0392281	N=3	1.09299	0.116928	N=3	0.0189163	0.0102113	N=3
43	1.0019	0.00990003	N=3	0.0915073	0.0256823	N=3	1.05823	0.0666925	N=3	0.0191057	0.0101043	N=3
44	0.9683	0.0357	N=3	0.0682397	0.0492469	N=3	1.0654	0.067414	N=3	0.0210307	0.00874855	N=3
45	0.9878	0.0272	N=3	0.0607357	0.0214424	N=3	1.06589	0.0766825	N=3	0.0225223	0.00781322	N=3
46	1.01945	0.00655001	N=3	0.0551097	0.0226519	N=3	1.08035	0.0685235	N=3	0.0221333	0.00912109	N=3
47	1.00775	0.01525	N=3	0.0496593	0.0288445	N=3	1.03042	0.0978555	N=3	0.021495	0.00860004	N=3
48	1.0088	0.0312	N=3	0.054688	0.027021	N=3	1.04767	0.087039	N=3	0.0212407	0.00956602	N=3
49	0.97605	0.05295	N=3	0.04852	0.0159536	N=3	1.08925	0.076369	N=3	0.0224457	0.009219	N=3
50	1.00475	0.06325	N=3	0.043929	0.0218989	N=3	1.07944	0.086954	N=3	0.0242753	0.00679167	N=3
51	0.93315	0.01785	N=3	0.045297	0.0212808	N=3	1.0225	0.044948	N=3	0.024833	0.00698064	N=3
52	0.92225	0.04075	N=3	0.0410263	0.0184448	N=3	0.971772	0.048713	N=3	0.0260513	0.00569661	N=3
53	0.9637	0.0703	N=3	0.0445413	0.021499	N=3	0.997657	0.0561285	N=3	0.0292323	0.00404509	N=3
54	0.9488	0.0642	N=3	0.0478107	0.0246055	N=3	0.962997	0.0476905	N=3	0.0278787	0.00445632	N=3
55	1.1009	0.0889	N=3	0.04731	0.0238553	N=3	0.94204	0.060586	N=3	0.028889	0.00298678	N=3
56	1.0852	0.0882	N=3	0.0490163	0.024927	N=3	0.954819	0.0614345	N=3	0.027399	0.00510322	N=3
57	1.14385	0.07785	N=3	0.048401	0.0232095	N=3	0.948075	0.0634615	N=3	0.0301563	0.00205749	N=3
58	1.13705	0.03905	N=3	0.0539137	0.0280305	N=3	0.999547	0.0790165	N=3	0.0276917	0.00669762	N=3
59	1.1227	0.0667	N=3	0.0711247	0.042773	N=3	0.962513	0.075524	N=3	0.047325	0.0161023	N=3
60	1.12675	0.05975	N=3	0.077451	0.0519372	N=3	0.99086	0.036548	N=3	0.043268	0.0232418	N=3
61	1.10745	0.08745	N=3	0.083992	0.051023	N=3	1.04264	0.0415365	N=3	0.096767	0.0386977	N=3
62	1.1298	0.0758	N=3	0.0918503	0.0602043	N=3	1.00709	0.0289685	N=3	0.17749	0.0575814	N=3
63	1.11285	0.10185	N=3	0.0582173	0.0342042	N=3	0.950962	0.025709	N=3	0.283212	0.0439542	N=3
64	1.1089	0.1059	N=3	0.063565	0.0355765	N=3	0.985336	0.0647245	N=3	0.315213	0.0352752	N=3
65	1.1175	0.1015	N=3	0.0575707	0.0363105	N=3	0.953421	0.00499099	N=3	0.337186	0.066975	N=3
66	1.12495	0.11295	N=3	0.0723727	0.0351537	N=3	0.960435	0.00873801	N=3	0.350716	0.0525488	N=3
67	1.14705	0.06805	N=3	0.0634997	0.031241	N=3	0.98163	0.0195285	N=3	0.403184	0.0263085	N=3
68	1.07135	0.03335	N=3	0.0654557	0.0314712	N=3	1.0158	0.055455	N=3	0.391325	0.0443046	N=3
69	1.0914	0.0644	N=3	0.0965583	0.0534164	N=3	1.04007	0.0746435	N=3	0.386673	0.0543317	N=3
70	1.0748	0.00919998	N=3	0.110656	0.0640967	N=3	1.0057	0.035638	N=3	0.423654	0.0378955	N=3
71	1.00385	0.03215	N=3	0.106019	0.0527842	N=3	0.986381	0.034136	N=3	0.57598	0.08332	N=3
72	1.0736	0.0966	N=3	0.0829297	0.0279113	N=3	0.982164	0.028099	N=3	0.479969	0.0226205	N=3
73	0.96905	0.08095	N=3	0.102768	0.027307	N=3	0.921018	0.00921249	N=3	0.61968	0.109592	N=3
74	0.9271	0.1059	N=3	0.102266	0.00572658	N=3	0.973694	0.0398135	N=3	0.623031	0.104257	N=3
75	0.91905	0.09495	N=3	0.146673	0.0367057	N=3	1.08055	0.119046	N=3	0.599588	0.0702648	N=3
76	0.87415	0.12985	N=3	0.169578	0.0555032	N=3	0.981469	0.0258665	N=3	0.550803	0.130784	N=3
77	0.8602	0.1318	N=3	0.17679	0.0590299	N=3	0.973951	0.0131865	N=3	0.580005	0.107913	N=3
78	0.87875	0.12525	N=3	0.200384	0.0837766	N=3	0.926103	0.0541235	N=3	0.600234	0.105915	N=3
79	0.9678	0.0472	N=3	0.237545	0.114633	N=3	0.96536	0.0340695	N=3	0.620446	0.0917231	N=3
80	0.9872	0.0388	N=3	0.313353	0.173683	N=3	0.971402	0.0486755	N=3	0.64769	0.0853916	N=3
81	0.98735	0.03565	N=3	0.280173	0.12762	N=3	0.975523	0.036768	N=3	0.686195	0.0729933	N=3
82	1.00105	0.03895	N=3	0.29725	0.139065	N=3	0.991412	0.026393	N=3	0.709604	0.0735438	N=3
83	0.99465	0.03435	N=3	0.325511	0.167198	N=3	1.05285	0.043291	N=3	0.731277	0.0601591	N=3
84	1.0167	0.0513	N=3	0.264622	0.101006	N=3	1.04334	0.038398	N=3	0.751602	0.0423347	N=3
85	0.96055	0.00955001	N=3	0.313759	0.172165	N=3	1.04348	0.0206415	N=3	0.779269	0.0658433	N=3
86	0.9576	0.0054	N=3	0.29104	0.12329	N=3	1.05707	0.0396575	N=3	0.837573	0.0875348	N=3
87	0.99405	0.03995	N=3	0.313431	0.131748	N=3	1.07498	0.0850735	N=3	0.86627	0.0849677	N=3
88	0.9716	0.0414	N=3	0.337708	0.162982	N=3	1.05696	0.074381	N=3	0.880334	0.0788949	N=3
89	0.97295	0.03905	N=3	0.293837	0.0861538	N=3	1.04635	0.0624385	N=3	0.87624	0.0902698	N=3
90	0.97925	0.01775	N=3	0.281513	0.0997288	N=3	1.02697	0.040762	N=3	0.897981	0.0826628	N=3
91	1.10825	0.04225	N=3	0.192322	0.092157	N=3	1.02834	0.050474	N=3	0.913648	0.0807767	N=3
92	1.12645	0.02845	N=3	0.195826	0.1038	N=3	1.04694	0.070926	N=3	0.92793	0.0845658	N=3
93	1.1149	0.0589	N=3	0.226144	0.128317	N=3	1.02228	0.0325805	N=3	0.936207	0.100066	N=3
94	1.13845	0.07145	N=3	0.217862	0.117467	N=3	1.03022	0.110036	N=3	0.983434	0.0674422	N=3
95	1.07245	0.05245	N=3	0.206508	0.125774	N=3	1.00666	0.00449097	N=3	0.998827	0.0647906	N=3
96	1.0934	0.0394	N=3	0.212287	0.117817	N=3	1.07902	0.0455775	N=3	1.01079	0.0732043	N=3
97	1.0768	0.0658	N=3	0.198169	0.111127	N=3	1.08923	0.076442	N=3	1.04435	0.0673243	N=3
98	1.07595	0.07295	N=3	0.203417	0.11813	N=3	1.04632	0.0202545	N=3	1.07346	0.0710613	N=3
99	1.07215	0.05615	N=3	0.200321	0.119254	N=3	1.01681	0.00226694	N=3	1.08628	0.0689204	N=3
100	0.98205	0.02995	N=3	0.210731	0.107257	N=3	0.994275	0.00364199	N=3	1.0948	0.0834264	N=3
101	1.0647	0.0143	N=3	0.219753	0.106847	N=3	1.04156	0.026005	N=3	1.11497	0.0834564	N=3
102	1.0033	0.0347	N=3	0.21159	0.130364	N=3	1.04732	0.04036	N=3	1.13102	0.0787678	N=3
103	1.02795	0.000950038	N=3	0.211316	0.112982	N=3	1.01544	0.00613052	N=3	1.14089	0.0851355	N=3
104	1.0323	0.0517	N=3	0.215301	0.128732	N=3	0.933922	0.0553175	N=3	1.15593	0.0805043	N=3
105	1.0082	0.0278	N=3	0.222074	0.126721	N=3	0.952492	0.000739485	N=3	1.16503	0.0741709	N=3
106	0.99195	0.01495	N=3	0.201943	0.117927	N=3	0.955969	0.012629	N=3	1.20422	0.0740626	N=3
107	1.0249	0.0251	N=3	0.220418	0.126072	N=3	1.05893	0.0781445	N=3	1.1538	0.0686216	N=3
108	1.0162	0.0168	N=3	0.224967	0.121553	N=3	0.985599	0.0373875	N=3	1.14899	0.0845094	N=3
109	1.0015	0.0125	N=3	0.2122	0.120164	N=3	1.02287	0.102175	N=3	1.24514	0.0661186	N=3
110	1.024	0.02	N=3	0.205713	0.109577	N=3	1.06873	0.045807	N=3	1.25681	0.0646608	N=3
111	1.0217	0.0297	N=3	0.205917	0.112571	N=3	1.07541	0.072061	N=3	1.28229	0.062412	N=3
112	1.0388	0.0348	N=3	0.219912	0.121851	N=3	1.06495	0.071314	N=3	1.29134	0.070131	N=3
113	1.0587	0.0437	N=3	0.209443	0.127848	N=3	1.04948	0.102832	N=3	1.29889	0.067546	N=3
114	1.0691	0.0431	N=3	0.217834	0.12979	N=3	1.06505	0.121167	N=3	1.29585	0.0445443	N=3
115	1.0102	0.0128	N=3	0.198186	0.117747	N=3	1.06825	0.114861	N=3	1.31744	0.0565412	N=3
116	1.0529	0.0129	N=3	0.24869	0.125257	N=3	1.07665	0.111152	N=3	1.28262	0.039498	N=3
117	1.06325	0.03425	N=3	0.345429	0.0103145	N=3	1.07948	0.116767	N=3	1.32902	0.0364975	N=3
118	1.0621	0.00589997	N=3	0.394882	0.020935	N=3	1.08124	0.115685	N=3	1.28885	0.0284574	N=3
119	1.0092	0.0582	N=3	0.393406	0.058292	N=3	1.07968	0.10448	N=3	1.28594	0.0255927	N=3
120			N=3	0.394484	0.05937	N=3			N=3	1.24553	0.0235085	N=3

## Sheet: Figure1a,b-SupplementaryFig1c,d
(min)	MEDULLA - CONT			MEDULLA - ISCH			MEDULLA - ISCH + HF			(min)	CORTEX - CONT			CORTEX - ISCH			CORTEX - ISCH + HF			Medulla - ISCH+BQ123			Medulla - ISCH+VAL			Cortex - ISCH+BQ123			Cortex - ISCH+VAL
-10	1.06764	0.067641	N=4	1.03928	0.0370441	N=4	1.06332	0.018912	N=4	-10	0.988236	0.0223183	N=4	1.05206	0.0189213	N=10	1.12443	0.0338435	N=4	0.974058	0.0501616	N=3	1.04745	0.0149965	N=2	1.00741	0.0144281	N=4	1.02624	0.0040955	N=3
-9	0.917538	0.036884	N=4	0.971825	0.0396177	N=4	0.957059	0.015018	N=4	-9	1.02455	0.0255547	N=4	0.953932	0.0189003	N=10	1.00026	0.0182385	N=4	0.964807	0.0126699	N=3	0.948276	0.0158655	N=2	1.00172	0.0231549	N=4	0.974314	0.00429049	N=3
-8	0.971603	0.0216605	N=4	0.977062	0.0146267	N=4	1.02206	0.00371998	N=4	-8	1.00756	0.0155605	N=4	1.01279	0.015484	N=10	1.09733	0.0609435	N=4	1.04791	0.0555867	N=3	1.01921	0.00128347	N=2	0.992981	0.0286867	N=4	1.00484	0.00386399	N=3
-7	0.923779	0.018129	N=4	1.0031	0.031563	N=4	0.957564	0.03765	N=4	-7	1.0223	0.0182358	N=4	0.983694	0.010914	N=10	0.994328	0.0123055	N=4	1.08757	0.0746026	N=3	0.985064	0.032145	N=2	0.996526	0.00917776	N=4	0.994603	0.00366899	N=3
-6	0.932122	0.043002	N=4	1.04268	0.0627435	N=4	1.02355	0.031321	N=4	-6	1.02883	0.0299715	N=4	0.95783	0.0153228	N=10	1.1037	0.054576	N=4	1.09745	0.132816	N=3	0.975298	0.0283135	N=2	0.959811	0.0345947	N=4	1.0164	0.0102265	N=3
-5	0.899457	0.023353	N=4	0.96809	0.0181459	N=4	1.01144	0.0271495	N=4	-5	0.998585	0.0192186	N=4	0.961821	0.0141837	N=10	1.0032	0.0211775	N=4	1.11072	0.122806	N=3	0.889921	0.0708245	N=2	0.965908	0.033917	N=4	1.02176	0.023016	N=3
-4	0.903191	0.0655075	N=4	0.932358	0.0309591	N=4	1.06433	0.001149	N=4	-4	0.997691	0.0239808	N=4	0.97693	0.0261302	N=10	1.13051	0.0277665	N=4	1.04676	0.108883	N=3	1.01927	0.00206548	N=2	1.00672	0.0178431	N=4	1.01243	0.00822651	N=3
-3	0.918748	0.101443	N=4	0.986128	0.0378157	N=4	1.02909	0.036867	N=4	-3	0.992675	0.0245342	N=4	0.967331	0.0330084	N=10	1.09467	0.06361	N=4	0.946548	0.0509302	N=3	0.944111	0.00287402	N=2	0.934026	0.0214437	N=4	1.02882	0.030673	N=3
-2	0.897127	0.076058	N=4	0.942286	0.0248647	N=4	1.05038	0.0660885	N=4	-2	0.98283	0.0374727	N=4	0.960211	0.0338378	N=10	1.0877	0.105676	N=4	0.835737	0.167735	N=3	0.939164	0.120068	N=2	0.991362	0.0462225	N=4	1.03917	0.027864	N=3
-1	0.925312	0.0873445	N=4	0.958666	0.0335115	N=4	1.11065	0.0474765	N=4	-1	1.00445	0.027187	N=4	0.892977	0.0302268	N=10	0.838889	0.020813	N=4	0.36961	0.11108	N=3	1.03822	0.021012	N=2	0.765393	0.0902268	N=4	1.00889	0.00277954	N=3
0	0.962306	0.117372	N=4	0.807891	0.196458	N=4	1.06177	0.0204595	N=4	0	1.10359	0.0365101	N=4	0.391659	0.117305	N=10	0.483608	0.293567	N=4	0.0804777	0.0471191	N=3	0.24171	0.24171	N=2	0.102385	0.0650128	N=4	0.242289	0.225026	N=3
1	0.878831	0.066682	N=4	0.174255	0.0986716	N=4	0.545662	0.021018	N=4	1	1.07654	0.0333414	N=4	0.162158	0.0696863	N=10	0.0985185	0.0985185	N=4	0.0796457	0.0225188	N=3	0.044528	0.002837	N=2	0.090046	0.0385854	N=4	0.043526	0.036078	N=3
2	0.89491	0.0859485	N=4	0.0423065	0.00994173	N=4	0.264543	0.158784	N=4	2	1.06275	0.0334305	N=4	0.0858272	0.0323325	N=10	0.320813	0.132069	N=4	0.076688	0.0230075	N=3	0.0798425	0.0657665	N=2	0.0328085	0.0065522	N=4	0.066924	0.036509	N=3
3	0.959121	0.146429	N=4	0.0572425	0.0257884	N=4	0.258016	0.062234	N=4	3	1.02669	0.0595883	N=4	0.0798362	0.0199586	N=10	0.359547	0.275047	N=4	0.0821637	0.0190486	N=3	0.053408	0.016187	N=2	0.0615747	0.0207529	N=4	0.050408	0.004747	N=3
4	0.915313	0.130301	N=4	0.0412805	0.0209674	N=4	0.223646	0.149262	N=4	4	1.05484	0.0491915	N=4	0.117919	0.0335753	N=10	0.181802	0.0379405	N=4	0.078395	0.022276	N=3	0.049533	0.036134	N=2	0.0440287	0.016842	N=4	0.045682	0.025653	N=3
5	0.942384	0.15091	N=4	0.0454585	0.0235278	N=4	0.236695	0.117623	N=4	5	1.01532	0.0589829	N=4	0.12704	0.0354208	N=10	0.175962	0.076514	N=4	0.091075	0.0229744	N=3	0.047188	0.009153	N=2	0.0556608	0.0232181	N=4	0.033983	0.003365	N=3
6	0.988712	0.155292	N=4	0.0419155	0.0196904	N=4	0.234101	0.145908	N=4	6	1.02889	0.0601875	N=4	0.122693	0.0339076	N=10	0.146703	0.0247205	N=4	0.124112	0.0459006	N=3	0.0600305	0.0216375	N=2	0.0809725	0.0540153	N=4	0.0356385	0.0180095	N=3
7	0.951719	0.1334	N=4	0.0427797	0.0215208	N=4	0.229999	0.114931	N=4	7	1.04335	0.0608324	N=4	0.102611	0.0279445	N=10	0.167706	0.055551	N=4	0.0791693	0.023334	N=3	0.0494845	0.0051985	N=2	0.0961827	0.0708178	N=4	0.027846	0.012377	N=3
8	0.974631	0.115641	N=4	0.0489622	0.0174338	N=4	0.245919	0.0880865	N=4	8	1.07195	0.0531561	N=4	0.131122	0.0435185	N=10	0.156268	0.0178155	N=4	0.0832373	0.0219559	N=3	0.0467575	0.0220705	N=2	0.0263275	0.00706254	N=4	0.0235555	0.0129635	N=3
9	1.01572	0.084066	N=4	0.0437722	0.0182254	N=4	0.279547	0.095089	N=4	9	1.07212	0.0520591	N=4	0.107953	0.0309437	N=10	0.158678	0.011443	N=4	0.0852913	0.0200021	N=3	0.0297845	0.0051335	N=2	0.0337148	0.0113421	N=4	0.0180735	0.0177915	N=3
10	0.992656	0.109757	N=4	0.0409887	0.0215665	N=4	0.287611	0.042337	N=4	10	1.0553	0.0487109	N=4	0.084845	0.0279203	N=10	0.148312	0.0067765	N=4	0.0905833	0.0199666	N=3	0.030589	0.007364	N=2	0.0252162	0.00863845	N=4	0.014806	0.014237	N=3
11	0.997529	0.0946395	N=4	0.037709	0.0186723	N=4	0.289842	0.091585	N=4	11	1.0522	0.0596081	N=4	0.0993645	0.0279236	N=10	0.148363	0.005659	N=4	0.083988	0.0163511	N=3	0.043483	0.01422	N=2	0.0304978	0.00898149	N=4	0.014845	0.014845	N=3
12	0.976233	0.108956	N=4	0.037355	0.0179136	N=4	0.281578	0.192373	N=4	12	1.08092	0.0798625	N=4	0.095243	0.0286792	N=10	0.135838	0.005122	N=4	0.0839417	0.0171042	N=3	0.0431765	0.0160025	N=2	0.031547	0.00769353	N=4	0.013076	0.012249	N=3
13	0.95897	0.123899	N=4	0.038189	0.0153248	N=4	0.186029	0.120475	N=4	13	1.08068	0.0655113	N=4	0.0958565	0.0290202	N=10	0.133699	0.0095985	N=4	0.0828767	0.0150735	N=3	0.0683055	0.0211405	N=2	0.032103	0.00779535	N=4	0.014771	0.007878	N=3
14	0.933767	0.151622	N=4	0.0460695	0.0128242	N=4	0.165905	0.118944	N=4	14	1.06948	0.0701059	N=4	0.0905554	0.0274383	N=10	0.130391	0.010798	N=4	0.0827543	0.0174416	N=3	0.074462	0.01442	N=2	0.0280898	0.00818665	N=4	0.019959	0.006252	N=3
15	0.956626	0.153686	N=4	0.0415895	0.0145535	N=4	0.184794	0.129859	N=4	15	1.05264	0.0689985	N=4	0.0885902	0.0276754	N=10	0.12132	0.014726	N=4	0.0789617	0.0186851	N=3	0.061959	0.026256	N=2	0.025446	0.00819861	N=4	0.0264465	0.0020255	N=3
16	0.964597	0.145838	N=4	0.028882	0.0140677	N=4	0.186355	0.117751	N=4	16	1.07726	0.0578551	N=4	0.0919238	0.0266412	N=10	0.114259	0.02057	N=4	0.079535	0.0171866	N=3	0.0689015	0.0660765	N=2	0.0269983	0.00603159	N=4	0.0275845	0.0024055	N=3
17	0.94385	0.149347	N=4	0.0277105	0.0118764	N=4	0.137326	0.0970845	N=4	17	1.08316	0.0620142	N=4	0.0969214	0.026311	N=10	0.113983	0.020879	N=4	0.0795673	0.0169675	N=3	0.067502	0.044025	N=2	0.0284343	0.00427277	N=4	0.0290585	0.0042265	N=3
18	0.942721	0.137178	N=4	0.0264498	0.0119906	N=4	0.109703	0.109461	N=4	18	1.05241	0.0625246	N=4	0.0908766	0.02844	N=10	0.112669	0.027929	N=4	0.0946973	0.0104714	N=3	0.056221	0.035203	N=2	0.0259598	0.00657647	N=4	0.021272	0.009139	N=3
19	0.945416	0.125202	N=4	0.0243888	0.0100017	N=4	0.185556	0.0153045	N=4	19	1.07151	0.0776758	N=4	0.0860661	0.0268452	N=10	0.109038	0.0330915	N=4	0.0848213	0.0143106	N=3	0.072149	0.05135	N=2	0.0276905	0.00491019	N=4	0.019067	0.007183	N=3
20	0.918569	0.116801	N=4	0.030251	0.00984237	N=4	0.19893	0.01562	N=4	20	1.0289	0.0689734	N=4	0.0824559	0.0282383	N=10	0.104948	0.038876	N=4	0.0841197	0.015999	N=3	0.118943	0.0974615	N=2	0.0262965	0.0060117	N=4	0.0223015	0.0089155	N=3
21	0.931012	0.126853	N=4	0.034724	0.0119978	N=4	0.148428	0.0481805	N=4	21	1.04623	0.0768767	N=4	0.097466	0.0239739	N=10	0.10632	0.0393055	N=4	0.093916	0.0115682	N=3	0.099129	0.084704	N=2	0.028967	0.00334018	N=4	0.020777	0.005733	N=3
22	0.936508	0.0883275	N=4	0.0234555	0.008513	N=4	0.159078	0.0281245	N=4	22	1.07258	0.0734814	N=4	0.109173	0.0279495	N=10	0.108333	0.0395665	N=4	0.0866257	0.0103008	N=3	0.061707	0.054869	N=2	0.028154	0.0033135	N=4	0.0240075	0.0036225	N=3
23	0.959387	0.086232	N=4	0.02753	0.00955789	N=4	0.136083	0.035589	N=4	23	1.04602	0.0637538	N=4	0.101951	0.0265785	N=10	0.111054	0.039243	N=4	0.0809293	0.0143893	N=3	0.0503695	0.0418225	N=2	0.0308728	0.00332794	N=4	0.0248525	0.0019375	N=3
24	0.953143	0.094069	N=4	0.01855	0.00853271	N=4	0.118473	0.0399255	N=4	24	1.00625	0.0797425	N=4	0.0955114	0.0251848	N=10	0.0984495	0.0249355	N=4	0.0765147	0.0166983	N=3	0.0531455	0.0365485	N=2	0.0297978	0.00360286	N=4	0.024347	0.00278	N=3
25	0.964134	0.071785	N=4	0.0286105	0.0105042	N=4	0.130681	0.0588265	N=4	25	1.03418	0.0801217	N=4	0.104083	0.0267812	N=10	0.103301	0.0275405	N=4	0.0756173	0.0175226	N=3	0.041105	0.039657	N=2	0.0269353	0.00513389	N=4	0.0246395	0.0044175	N=3
26	0.961619	0.0911445	N=4	0.0317653	0.0122835	N=4	0.127395	0.034922	N=4	26	1.07021	0.0546978	N=4	0.103283	0.0235446	N=10	0.105898	0.0291345	N=4	0.075604	0.0178274	N=3	0.044794	0.033242	N=2	0.0270312	0.00535202	N=4	0.0194985	0.0011085	N=3
27	0.964993	0.079503	N=4	0.0258318	0.00822033	N=4	0.110584	0.0178865	N=4	27	1.06435	0.0397547	N=4	0.107947	0.026609	N=10	0.100752	0.034966	N=4	0.0747927	0.0183002	N=3	0.0289275	0.0136025	N=2	0.0262335	0.00480731	N=4	0.0186895	0.0013425	N=3
28	0.949244	0.084392	N=4	0.026003	0.00914322	N=4	0.102606	0.0062505	N=4	28	1.04684	0.0410975	N=4	0.106929	0.0254332	N=10	0.101201	0.042133	N=4	0.0755473	0.0178906	N=3	0.009004	0.004358	N=2	0.0256753	0.00533864	N=4	0.0120165	0.0027765	N=3
29	0.930063	0.0966135	N=4	0.0201398	0.00737883	N=4	0.078457	0.02537	N=4	29	1.01656	0.0571169	N=4	0.103078	0.0276224	N=10	0.0975585	0.0498305	N=4	0.0759683	0.0179378	N=3	0.0143315	0.0143315	N=2	0.0258008	0.0060152	N=4	0.0177975	0.0050095	N=3
30	0.922427	0.081635	N=4	0.0212517	0.00805145	N=4	0.057019	0.002234	N=4	30	1.02258	0.0471258	N=4	0.109086	0.0265406	N=10	0.104581	0.0499495	N=4	0.0762673	0.0178169	N=3	0.014141	0.01288	N=2	0.0252195	0.00621887	N=4	0.018118	0.003892	N=3
31	0.939164	0.0822025	N=4	0.022144	0.00958279	N=4	0.045791	0.013572	N=4	31	1.04093	0.0396184	N=4	0.116975	0.0330232	N=10	0.102347	0.0558865	N=4	0.0764077	0.0178168	N=3	0.020217	0.004157	N=2	0.0227835	0.00803382	N=4	0.016851	0.001028	N=3
32	0.974314	0.058987	N=4	0.0213218	0.00994611	N=4	0.017168	0.002379	N=4	32	1.06674	0.0454525	N=4	0.110879	0.0329955	N=10	0.103267	0.063479	N=4	0.076282	0.0177986	N=3	0.028025	6.89998e-05	N=2	0.021944	0.00818982	N=4	0.0160975	0.0038525	N=3
33	0.965298	0.070065	N=4	0.0205927	0.0078244	N=4	0.0153615	0.0076295	N=4	33	1.04199	0.0396946	N=4	0.111369	0.0283557	N=10	0.107192	0.0684345	N=4	0.0764317	0.0179091	N=3	0.034439	0.013353	N=2	0.0234445	0.00770518	N=4	0.018039	0.001497	N=3
34	1.00374	0.0460525	N=4	0.020927	0.0081606	N=4	0.027825	0.022537	N=4	34	1.01429	0.0673581	N=4	0.107098	0.0307021	N=10	0.101348	0.067329	N=4	0.0763273	0.0178587	N=3	0.047731	0.011333	N=2	0.024496	0.00781932	N=4	0.0147265	0.0018285	N=3
35	0.970075	0.047091	N=4	0.0175855	0.00804267	N=4	0.055332	0.047796	N=4	35	1.03503	0.067844	N=4	0.096278	0.029965	N=10	0.105698	0.066035	N=4	0.076603	0.0180467	N=3	0.0662015	0.0062455	N=2	0.0260583	0.00630294	N=4	0.017498	0.003969	N=3
36	0.987437	0.0229375	N=4	0.0180037	0.00828881	N=4	0.0418875	0.0383875	N=4	36	1.0343	0.0569513	N=4	0.0843808	0.02934	N=10	0.113513	0.068686	N=4	0.0769803	0.0184573	N=3	0.0406305	0.0159125	N=2	0.0273387	0.00832634	N=4	0.0221045	0.0014325	N=3
37	0.946206	0.0143325	N=4	0.017472	0.00846822	N=4	0.029384	0.023148	N=4	37	1.09784	0.0644347	N=4	0.0812847	0.0282016	N=10	0.0996345	0.0698815	N=4	0.0773367	0.0183073	N=3	0.041882	0.01151	N=2	0.0250693	0.00595919	N=4	0.0193665	0.0030295	N=3
38	0.96924	0.0273045	N=4	0.0175225	0.00828589	N=4	0.032736	0.023841	N=4	38	1.0169	0.0572377	N=4	0.0812187	0.0278608	N=10	0.0920175	0.0616505	N=4	0.0767507	0.0177344	N=3	0.045574	0.011149	N=2	0.0262567	0.00462197	N=4	0.0175045	0.0034005	N=3
39	0.979823	0.060063	N=4	0.016683	0.00837083	N=4	0.024746	0.017117	N=4	39	0.973493	0.0708638	N=4	0.0751575	0.0273719	N=10	0.0922035	0.0749375	N=4	0.0770563	0.0178194	N=3	0.0427305	0.0088765	N=2	0.0257547	0.00559403	N=4	0.0144025	0.0022325	N=3
40	0.963456	0.0617435	N=4	0.0143885	0.00851876	N=4	0.019597	0.015156	N=4	40	0.984995	0.0652014	N=4	0.125258	0.0584292	N=10	0.26232	0.246023	N=4	0.076835	0.0179381	N=3	0.0391815	0.0069915	N=2	0.0264817	0.0058512	N=4	0.013088	0.005152	N=3
41	0.977649	0.0736315	N=4	0.0219895	0.0089484	N=4	0.0299015	0.0229665	N=4	41	0.99769	0.0631334	N=4	0.0733788	0.0182507	N=10	0.0463195	0.0247995	N=4	0.076888	0.0181934	N=3	0.036946	0.015137	N=2	0.025543	0.00461833	N=4	0.0118465	0.0014775	N=3
42	0.983887	0.07895	N=4	0.0575852	0.0400755	N=4	0.031042	0.027089	N=4	42	1.00752	0.058199	N=4	0.0990523	0.0353769	N=10	0.137942	0.11577	N=4	0.0762843	0.0179402	N=3	0.029517	0.00195	N=2	0.025406	0.00480556	N=4	0.013712	0.005312	N=3
43	0.997857	0.0802725	N=4	0.0455105	0.0273844	N=4	0.0302015	0.0238125	N=4	43	1.01612	0.0578192	N=4	0.0939658	0.0236739	N=10	0.0421555	0.0091635	N=4	0.0765107	0.0177909	N=3	0.027636	0.004576	N=2	0.025947	0.00643592	N=4	0.010656	0.000348	N=3
44	0.990445	0.085542	N=4	0.0140822	0.0092909	N=4	0.042269	0.034969	N=4	44	1.01755	0.058238	N=4	0.109282	0.0416379	N=10	0.0401475	0.0111715	N=4	0.0756033	0.017816	N=3	0.0269255	0.0025665	N=2	0.0264843	0.00540992	N=4	0.008585	0.005089	N=3
45	1.00041	0.101286	N=4	0.021709	0.0102925	N=4	0.029848	0.022022	N=4	45	1.05904	0.0682795	N=4	0.0758419	0.0242475	N=10	0.0394735	0.0316455	N=4	0.0759613	0.0178474	N=3	0.0334285	0.0004685	N=2	0.0284825	0.00436117	N=4	0.01336	0.000745	N=3
46	1.01503	0.097953	N=4	0.0191395	0.00929767	N=4	0.028748	0.022025	N=4	46	1.08008	0.074191	N=4	0.115386	0.0439061	N=10	0.139609	0.114103	N=4	0.0750357	0.0179551	N=3	0.0178745	0.0111825	N=2	0.025854	0.00546543	N=4	0.0199845	0.0022805	N=3
47	0.999235	0.110313	N=4	0.0127297	0.00978494	N=4	0.0264835	0.0223755	N=4	47	1.02823	0.0657911	N=4	0.072746	0.0252781	N=10	0.109232	0.0729665	N=4	0.077191	0.0178771	N=3	0.03316	0.005925	N=2	0.026943	0.00461193	N=4	0.0119345	0.0001555	N=3
48	0.973503	0.134287	N=4	0.0174603	0.00888056	N=4	0.0175715	0.0073335	N=4	48	1.05974	0.0766498	N=4	0.10194	0.029498	N=10	0.0970475	0.0724685	N=4	0.0692233	0.0193642	N=3	0.0421295	0.0171625	N=2	0.0280052	0.00286905	N=4	0.0131655	0.0027685	N=3
49	0.982027	0.140839	N=4	0.0187767	0.00943665	N=4	0.0161485	0.0098805	N=4	49	1.03854	0.057483	N=4	0.0721645	0.0189398	N=10	0.0947615	0.0589065	N=4	0.051164	0.0312184	N=3	0.07978	1.8999e-05	N=2	0.28606	0.259757	N=4	0.014503	0.001687	N=3
50	0.97117	0.120253	N=4	0.0137418	0.0100284	N=4	0.0133445	0.0073975	N=4	50	1.01293	0.062194	N=4	0.0729972	0.0207819	N=10	0.102761	0.066755	N=4	0.060173	0.0237068	N=3	0.0945725	0.0194145	N=2	0.0302987	0.00263144	N=4	0.0086955	0.0018535	N=3
51	0.959387	0.110386	N=4	0.015647	0.00945595	N=4	0.0154405	0.0077535	N=4	51	1.05777	0.0716323	N=4	0.0926521	0.0218667	N=10	0.266039	0.235654	N=4	0.06412	0.0233276	N=3	0.0997695	0.0381955	N=2	0.0300533	0.00225687	N=4	0.008471	0.001532	N=3
52	0.976572	0.10407	N=4	0.0156185	0.00974506	N=4	0.011701	0.006244	N=4	52	0.975357	0.07357	N=4	0.088973	0.0233433	N=10	0.0486325	0.0224865	N=4	0.0619313	0.0203616	N=3	0.0817435	0.0140375	N=2	0.0304155	0.00262894	N=4	0.0119995	0.0048625	N=3
53	0.95406	0.0731855	N=4	0.0142878	0.0102635	N=4	0.0125675	0.0083665	N=4	53	0.965602	0.0837517	N=4	0.0932853	0.0262767	N=10	0.134658	0.119054	N=4	0.0663403	0.0251836	N=3	0.0488465	0.0172535	N=2	0.0302612	0.00154371	N=4	0.01505	0.009636	N=3
54	0.936173	0.055875	N=4	0.0139845	0.0106387	N=4	0.0135285	0.0092195	N=4	54	0.961694	0.0865297	N=4	0.0984689	0.0283534	N=10	0.032161	0.019158	N=4	0.0600207	0.0165454	N=3	0.0507685	0.0110375	N=2	0.0308232	0.00269301	N=4	0.016007	0.011694	N=3
55	0.969473	0.098344	N=4	0.0176947	0.00983134	N=4	0.011308	0.007014	N=4	55	0.932954	0.0997625	N=4	0.10338	0.0325094	N=10	0.0283215	0.0229975	N=4	0.0727187	0.0286649	N=3	0.038047	0.007614	N=2	0.0293305	0.00388298	N=4	0.0128735	0.0128735	N=3
56	0.959493	0.0820835	N=4	0.0160122	0.0106605	N=4	0.008088	0.003546	N=4	56	0.93268	0.102898	N=4	0.101113	0.031739	N=10	0.040747	0.030372	N=4	0.0540713	0.00905603	N=3	0.0334215	0.0030255	N=2	0.0298938	0.00493489	N=4	0.0114115	0.0025655	N=3
57	0.936686	0.13699	N=4	0.0151912	0.0120821	N=4	0.010415	0.005171	N=4	57	0.941137	0.103768	N=4	0.0965297	0.0319006	N=10	0.133533	0.120179	N=4	0.0835573	0.0404439	N=3	0.036158	0.001025	N=2	0.0268143	0.00523789	N=4	0.0164505	0.0003365	N=3
58	0.981046	0.094814	N=4	0.020486	0.010507	N=4	0.011096	0.003207	N=4	58	0.940605	0.0945595	N=4	0.102292	0.0360353	N=10	0.098049	0.08415	N=4	0.030288	0.0151941	N=3	0.043628	0.00903	N=2	0.040711	0.0124885	N=4	0.006173	0.002621	N=3
59	1.01373	0.0679055	N=4	0.021254	0.0107836	N=4	0.0042055	0.0030235	N=4	59	0.962322	0.0806724	N=4	0.110262	0.0432196	N=10	0.0975665	0.0846325	N=4	0.208075	0.167223	N=3	0.045715	0.007472	N=2	0.139931	0.0656062	N=4	0.0160585	0.0038115	N=3
60	1.01364	0.074355	N=4	0.0158588	0.0108898	N=4	0.0043705	0.0043705	N=4	60	0.992622	0.0674848	N=4	0.195428	0.0788687	N=10	0.223595	0.212588	N=4	0.475398	0.422931	N=3	0.149999	0.047296	N=2	0.184108	0.0956684	N=4	0.0209765	0.0070245	N=3
61	1.02161	0.076319	N=4	0.0280045	0.0146826	N=4	0.0085875	0.0085875	N=4	61	1.02839	0.0323107	N=4	0.170911	0.0487216	N=10	0.249056	0.232821	N=4	0.358264	0.153336	N=3	0.283677	0.064293	N=2	0.222698	0.0954915	N=4	0.340041	0.024057	N=3
62	1.01081	0.0953745	N=4	0.0470278	0.0263903	N=4	0.0535685	0.0425885	N=4	62	1.00787	0.0419385	N=4	0.215538	0.0448188	N=10	0.226493	0.206868	N=4	0.358693	0.158789	N=3	0.301312	0.0422515	N=2	0.306496	0.0821439	N=4	0.351768	0.0262085	N=3
63	0.994933	0.091004	N=4	0.0421882	0.0258781	N=4	0.085552	0.047035	N=4	63	0.963348	0.0606399	N=4	0.287274	0.0353347	N=10	0.231794	0.231794	N=4	0.335596	0.126686	N=3	0.328473	0.0644955	N=2	0.303936	0.0754334	N=4	0.258628	0.143133	N=3
64	0.945117	0.0710235	N=4	0.0501545	0.0312352	N=4	0.131479	0.0203165	N=4	64	0.992409	0.0528041	N=4	0.298503	0.0243612	N=10	0.267392	0.223021	N=4	0.40221	0.144699	N=3	0.351174	0.084797	N=2	0.314449	0.0707402	N=4	0.288859	0.142148	N=3
65	0.930354	0.09012	N=4	0.0525813	0.0366779	N=4	0.219331	0.018462	N=4	65	0.992003	0.047617	N=4	0.316756	0.0351582	N=10	0.501904	0.09485	N=4	0.389935	0.144087	N=3	0.370744	0.104729	N=2	0.312567	0.0794937	N=4	0.32397	0.120127	N=3
66	0.911926	0.114678	N=4	0.0748593	0.043656	N=4	0.30311	0.104934	N=4	66	0.966136	0.0786931	N=4	0.325777	0.0331322	N=10	0.55441	0.073078	N=4	0.497894	0.195774	N=3	0.368965	0.120329	N=2	0.323906	0.0828844	N=4	0.383815	0.0868695	N=3
67	0.910497	0.115208	N=4	0.071686	0.0452287	N=4	0.421735	0.186573	N=4	67	0.972709	0.0804881	N=4	0.378787	0.0334453	N=10	0.557064	0.0777905	N=4	0.500031	0.205346	N=3	0.376474	0.098635	N=2	0.345831	0.0765808	N=4	0.430632	0.0578035	N=3
68	0.898825	0.086415	N=4	0.086482	0.0435384	N=4	0.424154	0.146884	N=4	68	0.992387	0.0837219	N=4	0.39219	0.0348098	N=10	0.600128	0.0473485	N=4	0.510805	0.207165	N=3	0.363112	0.105494	N=2	0.365591	0.0763576	N=4	0.481944	0.028826	N=3
69	0.875694	0.0738755	N=4	0.112747	0.0544913	N=4	0.584568	0.203717	N=4	69	0.997731	0.0985228	N=4	0.425673	0.046732	N=10	0.625309	0.00554299	N=4	0.550765	0.200559	N=3	0.375213	0.107458	N=2	0.395785	0.063194	N=4	0.510047	0.00563201	N=3
70	0.874421	0.0783405	N=4	0.116916	0.0619394	N=4	0.687244	0.244202	N=4	70	0.981334	0.0987781	N=4	0.450922	0.0602604	N=10	0.690951	0.015237	N=4	0.576315	0.199462	N=3	0.390689	0.097403	N=2	0.419384	0.0855463	N=4	0.53562	0.0112375	N=3
71	0.865262	0.0688445	N=4	0.112982	0.0579236	N=4	0.715955	0.199355	N=4	71	0.978937	0.0810164	N=4	0.492664	0.0471936	N=10	0.804647	0.0879865	N=4	0.601303	0.188961	N=3	0.38347	0.0855505	N=2	0.472125	0.112499	N=4	0.530176	0.00446501	N=3
72	0.868181	0.0505085	N=4	0.10154	0.0551684	N=4	0.865363	0.336384	N=4	72	0.993427	0.0712509	N=4	0.594507	0.0944515	N=10	0.815014	0.059595	N=4	0.603484	0.210657	N=3	0.380605	0.0831915	N=2	0.527378	0.0810978	N=4	0.557592	0.00917351	N=3
73	0.885903	0.0368345	N=4	0.117248	0.0541415	N=4	0.937409	0.345081	N=4	73	1.00041	0.0813591	N=4	0.591735	0.0589967	N=10	0.838792	0.0539805	N=4	0.639448	0.236445	N=3	0.400524	0.089448	N=2	0.541145	0.0868453	N=4	0.561772	0.00854901	N=3
74	0.901574	0.0543345	N=4	0.120966	0.0543443	N=4	0.989998	0.325334	N=4	74	1.03833	0.0829528	N=4	0.602892	0.0554949	N=10	0.906822	0.091566	N=4	0.600508	0.272536	N=3	0.395842	0.082569	N=2	0.574276	0.0823102	N=4	0.595301	0.0157455	N=3
75	0.90005	0.0559285	N=4	0.160607	0.0603429	N=4	1.04456	0.356498	N=4	75	1.00383	0.0634768	N=4	0.612664	0.0498797	N=10	0.938142	0.106179	N=4	0.824366	0.136732	N=3	0.403164	0.0998405	N=2	0.617703	0.0597394	N=4	0.633885	0.0242035	N=3
76	0.88704	0.058491	N=4	0.184208	0.0690626	N=4	1.07226	0.277997	N=4	76	1.04779	0.0545526	N=4	0.578903	0.0693557	N=10	0.983151	0.125392	N=4	0.741268	0.212568	N=3	0.428557	0.109134	N=2	0.610937	0.0795056	N=4	0.675798	0.0420465	N=3
77	0.871625	0.0519475	N=4	0.192818	0.0722141	N=4	1.03885	0.20553	N=4	77	1.02857	0.0622415	N=4	0.613761	0.0646458	N=10	1.0259	0.134766	N=4	0.77948	0.188048	N=3	0.4736	0.077012	N=2	0.620823	0.0878976	N=4	0.721107	0.056183	N=3
78	0.854545	0.0549225	N=4	0.220281	0.0811231	N=4	1.1874	0.284384	N=4	78	0.994137	0.0563332	N=4	0.6386	0.067668	N=10	1.02115	0.114967	N=4	0.791161	0.203375	N=3	0.483627	0.0634505	N=2	0.651844	0.0667829	N=4	0.774123	0.0527115	N=3
79	0.860925	0.04647	N=4	0.25736	0.096145	N=4	1.15023	0.185585	N=4	79	1.08992	0.0689552	N=4	0.666964	0.069084	N=10	0.992491	0.073927	N=4	0.925285	0.168419	N=3	0.494642	0.035146	N=2	0.67801	0.0601984	N=4	0.81477	0.072573	N=3
80	0.860591	0.0532465	N=4	0.322632	0.132776	N=4	1.20058	0.161472	N=4	80	1.03538	0.0627949	N=4	0.67907	0.0645585	N=10	1.00313	0.06633	N=4	1.03402	0.174273	N=3	0.495071	0.05224	N=2	0.723971	0.0452626	N=4	0.844642	0.0896815	N=3
81	0.897842	0.0369445	N=4	0.314402	0.0945199	N=4	1.26587	0.135826	N=4	81	1.01425	0.0459461	N=4	0.697581	0.0556936	N=10	1.01594	0.0588425	N=4	1.01197	0.152417	N=3	0.528095	0.0438025	N=2	0.806864	0.0148564	N=4	0.885953	0.096439	N=3
82	0.932749	0.0075725	N=4	0.339381	0.100994	N=4	1.37802	0.057253	N=4	82	1.03102	0.0408177	N=4	0.719519	0.054887	N=10	1.01558	0.0355435	N=4	0.9726	0.158669	N=3	0.51915	0.0485695	N=2	0.809294	0.0221255	N=4	0.904012	0.111045	N=3
83	0.91438	0.014174	N=4	0.375233	0.113601	N=4	1.35961	0.010804	N=4	83	1.03825	0.0422303	N=4	0.739329	0.0549011	N=10	1.05678	0.0487595	N=4	0.870523	0.182651	N=3	0.513914	0.073425	N=2	0.80682	0.0416715	N=4	0.933096	0.110835	N=3
84	0.919435	0.00140002	N=4	0.342591	0.0742932	N=4	1.39198	0.071818	N=4	84	1.03607	0.0507336	N=4	0.776348	0.0510408	N=10	1.03703	0.0396685	N=4	0.997999	0.159837	N=3	0.557919	0.047605	N=2	0.843202	0.0350614	N=4	0.969711	0.103806	N=3
85	0.892951	0.00795901	N=4	0.388084	0.11636	N=4	1.45085	0.0704665	N=4	85	1.0252	0.0619532	N=4	0.799025	0.058441	N=10	1.06086	0.052799	N=4	1.04065	0.168948	N=3	0.585032	0.0374745	N=2	0.821237	0.0614125	N=4	0.999899	0.097924	N=3
86	0.982173	0.0834725	N=4	0.406062	0.0741349	N=4	1.47533	0.079125	N=4	86	1.03485	0.060231	N=4	0.803633	0.0555329	N=10	1.07718	0.0518065	N=4	1.01318	0.16115	N=3	0.613572	0.0531565	N=2	0.81608	0.0893929	N=4	1.03957	0.0673825	N=3
87	1.00721	0.0998815	N=4	0.438242	0.0769033	N=4	1.49915	0.147694	N=4	87	1.03952	0.0646858	N=4	0.824704	0.0572946	N=10	1.07757	0.0353945	N=4	1.05524	0.220293	N=3	0.651321	0.0289365	N=2	0.870345	0.0887771	N=4	1.05074	0.069819	N=3
88	0.954626	0.045572	N=4	0.462146	0.0902245	N=4	1.65643	0.162046	N=4	88	1.03916	0.0732133	N=4	0.849882	0.0601887	N=10	1.102	0.0448895	N=4	1.18013	0.171282	N=3	0.683961	0.014267	N=2	0.904077	0.0907455	N=4	1.06546	0.0662355	N=3
89	0.9362	0.019403	N=4	0.423865	0.0651495	N=4	1.65431	0.21604	N=4	89	1.06803	0.0521316	N=4	0.860885	0.0604798	N=10	1.15131	0.087481	N=4	1.13651	0.268088	N=3	0.644876	0.06722	N=2	0.971219	0.0719825	N=4	1.08921	0.0538696	N=3
90	0.911099	5.54919e-05	N=4	0.443129	0.0643104	N=4	1.67585	0.23758	N=4	90	1.07008	0.0578436	N=4	0.889497	0.0624486	N=10	1.18078	0.116744	N=4	1.2289	0.214928	N=3	0.674161	0.096505	N=2	1.01354	0.086895	N=4	1.08356	0.010875	N=3
