# Supplementary material for: Pericyte-mediated constriction of renal capillaries evokes no-reflow and kidney injury following ischaemia
Source: eLife. 2022 Mar 14;11:e74211. doi: 10.7554/eLife.74211 (PMC8947765; doi:10.7554/eLife.74211)
Supplement: Figure 2—source data 1. [file elife-74211-fig2-data1.xlsx]

## Sheet: Plan1
Figure 2e - Medulla - Total perfused length (µm)	CONT	ISCH	ISCH+HF			Figure 2f -Medulla - Number of perfused segments	CONT	ISCH	ISCH+HF		Figure 2g - Medulla - Volume fraction occupied by perfused capillaries	CONT	ISCH	ISCH+HF
	15306	8931.35	29256.4				442	216	725			0.1031	0.04201	0.0677
	32420.4	12835	9966.82				829	335	279			0.09457	0.06532	0.1013
	6220.88	9122.84	35106.3				450	224	893			0.1245	0.05143	0.1088
	14654.1	7219.79	35945.9				381	203	958			0.1096	0.0699	0.1186
	18040.2						573					0.1428
	11482.1						510					0.103
	4700.53											0.1367
Number of animals	7	4	4			Number of animals	6	4	4		Number of animals	7	4	4
Mean	14689	9527	27569			Mean	530.8	244.5	713.8		Mean	0.1163	0.05717	0.0991
Std. Deviation	9199	2365	12106			Std. Deviation	160	60.95	306		Std. Deviation	0.0185	0.0128	0.0221
Std. Error of Mean	3477	1183	6053			Std. Error of Mean	65.32	30.48	153		Std. Error of Mean	0.006993	0.006398	0.01105
