# Supplementary material for: Pericyte-mediated constriction of renal capillaries evokes no-reflow and kidney injury following ischaemia
Source: eLife. 2022 Mar 14;11:e74211. doi: 10.7554/eLife.74211 (PMC8947765; doi:10.7554/eLife.74211)
Supplement: Figure 3—source data 1. [file elife-74211-fig3-data1.xlsx]

## Sheet: Figure 3
Figure 3d Cortex - Total perfused length (µm)	CONT	ISCH	ISCH+HF			Figure 3e Cortex - Number of perfused segments	CONT	ISCH	ISCH+HF		Figure 3f Cortex - Volume fraction occupied by perfused capillaries	CONT	ISCH	ISCH+HF
	23431	743.29	16577				670	365	577.333			0.1042	0.004429	0.128833
	16480	1850.93	11713.1				489	279	465			0.1431	0.03151	0.0953667
	10987	398.784	16517.8				530	451	589.333			0.0982	0.01285	0.111673
	12480	9643.88	14587.4				409	329	520			0.1391	0.07292	0.10965
	17320	2619.05					554	146				0.1122	0.1054
	19220	17208.9					621	523				0.1271	0.1015
	15170						578					0.1112
Number of animals	7	6	4			Number of animals	7	6	4		Number of animals	7	6	4
Mean	16441	5411	14849			Mean	550.1	348.8	537.9		Mean	0.1193	0.05477	0.1114
Std. Deviation	4171	6701	2286			Std. Deviation	85.87	132.2	57.26		Std. Deviation	0.01736	0.04452	0.01371
Std. Error of Mean	1577	2735	1143			Std. Error of Mean	32.46	53.99	28.63		Std. Error of Mean	0.006562	0.01817	0.006856
Figure 3g - Perfused (% control)	Afferent	Efferent	Glomeruli			Figure 3h - Afferent arteriole diameter (µm)	CONT	ISCH	ISCH+HF		Figure 3i - Efferent arteriole diameter (µm)	CONT	ISCH	ISCH+HF
	94.9521	95.4643	81.949				7.86881	9.00225	9.76393			6.64674	6.33171	6.7931
	100.632	98.25	106.481				8.57592	9.18492	7.92986			6.66607	6.10482	5.82386
	98.3579	95.5821	124.227				8.72317	9.6277	9.31939			6.26742	6.41726	5.78085
	93.3684	96.8571	92.6235				8.46453	9.24762	9.57141			5.71176	6.17826	7.43412
Number of animals	4	4	4			Number of animals	4	4	4		Number of animals	4	4	4
Mean	96.83	96.54	101.3			Mean	8.408	9.266	9.146		Mean	6.323	6.258	6.458
Std. Deviation	3.281	1.304	18.28			Std. Deviation	0.3748	0.2629	0.831		Std. Deviation	0.4469	0.1422	0.8012
Std. Error of Mean	1.641	0.6519	9.139			Std. Error of Mean	0.1874	0.1314	0.4155		Std. Error of Mean	0.2235	0.07108	0.4006
