# Supplementary material for: Pericyte-mediated constriction of renal capillaries evokes no-reflow and kidney injury following ischaemia
Source: eLife. 2022 Mar 14;11:e74211. doi: 10.7554/eLife.74211 (PMC8947765; doi:10.7554/eLife.74211)
Supplement: Figure 4—figure supplement 1—source data 1. [file elife-74211-fig4-figsupp1-data1.xlsx]

## Sheet: Plan1
	% of descending vasa recta blocked	% of descending vasa recta with RBC at blockage sites
	45	0
	50	0
	73.3333	9.09091
	84.6154	0
	59.0909	18.1818
	71.4286	0
		6.66667
Mean	63.91	4.848
Std. Deviation	15.15	6.989
Std. Error of Mean	6.187	2.642
