# Supplementary material for: Pericyte-mediated constriction of renal capillaries evokes no-reflow and kidney injury following ischaemia
Source: eLife. 2022 Mar 14;11:e74211. doi: 10.7554/eLife.74211 (PMC8947765; doi:10.7554/eLife.74211)
Supplement: Figure 4—figure supplement 1—source data 2. [file elife-74211-fig4-figsupp1-data2.xlsx]

## Sheet: d
Distance across vessel wall (um)	0	5	10	5	10
0	11.2767	10.5882	9.8855	17.5095	20.322
0.6252	10.2642	12.626	9.4864	18.169	18.7705
1.2503	9.72	15.6618	11.2373	21.5366	22.3013
1.8755	10.186	20.292	19.4184	34.5099	34.677
2.5007	23.3824	26.8378	28.3348	49.6943	51.1411
3.1258	64.9605	40.8218	37.5286	56.4399	68.7101
3.751	91.1102	47.0437	43.7938	55.8048	68.2119
4.3762	84.8252	43.2325	42.8983	48.2613	54.5359
5.0014	57.2234	31.0414	34.9542	36.3687	35.6802
5.6265	45.3258	20.9326	24.3561	23.5769	22.6356
6.2517	33.7783	18.0335	16.046	16.3838	17.5051
6.8769	23.408	15.3711	11.2691	10.2043	16.7656
7.502	17.5087	13.9034	10.4102	7.1549	17.3262
8.1272	14.1649	13.8694	10.8429	6.578	17.8907
8.7524	10.2473	13.3622	12.9354	6.7571	18.2479
9.3775	7.5119	12.5326	17.2776	7.3689	17.3808
10.0027	6.7993	10.5538	22.0102	8.3005	17.4511
10.6279	6.9529	8.9553	24.6655	9.2421	17.2991
11.2531	7.9162	8.5346	25.373	9.586	17
11.8782	8.4789	8.2788	24.1274	10.0392	17
12.5034	9.1109	8.8737	19.8841	10.9683	17.1031
13.1286	9.7669	10.5797	14.6486	12.3847	20.0935
13.7537	11.4681	13.8541	14.7176	15.1356	23.7477
14.3789	16.0663	21.8883	17.9732	21.7118	30.1652
15.0041	23.3736	35.111	26.8694	31.8811	36.8073
15.6292	36.9338	48.9113	42.8454	48.2005	46.1807
16.2544	50.0164	62.9214	56.3326	55.4831	51.702
16.8796	53.9816	77.0398	53.1541	46.2018	45.8133
17.5048	50.1369	73.5516	27.5052	13.7506	16.3013
18.1299	20.6847	47.3705	11.2886	7.9928	3.1718
18.7551	7.4486	22.4543	7.5041	6.404	0.7799
19.3803	6.9135	18.898	7.5187	5.448
20.0054	7.329	13.3093	8	3.743
20.6306	7.3992		8.0522
			9.3872

## Sheet: f
Distance from pericte soma (um)	CONTROL - Endothelial glycocalyx (Mean fluorescence intensity)			ISCHAEMIA ( Endothelial glycocalyx (Mean fluorescence intensity)
0	17.28	1.195	30	17.12	1.355	30
5	18.99	0.9809	30	18.22	1.047	30
10	18.88	1.188	28	18.26	1.249	30

## Sheet: g
Control (Endothelial glycocalyx (Mean fluorescence intensity)	Ischemia (Endothelial glycocalyx (Mean fluorescence intensity)
14.6116	15.716
7.86225	10.425
29.4062	23.094
11.2968	15.128
16.5214	14.864
15.3656	15.227
21.3014	20.77
17.8132	40.824
21.6483	26.84
18.8411	16.901
18.3325	10.026
15.4578	26.132
19.9881	16.695
19.7481	15.021
18.6211	24.176
13.1321	11.96
20.5766	25.079
27.4675	6.747
18.2796	20.728
24.567	6.242
29.7065	17.263
29.6196	23.534
20.8299	18.745
13.494	17.795
8.34261	14.736
20.225	16.091
21.5372	9.076
13.8149	3.358
12.6961	16.787
6.52244	13.525
13.2243	10.456
7.92167	17.932
10.6554	15.483
20.2076	14.007
25.7199	21.206
15.3941	28.205
21.8636	31.159
20.8019	26.076
19.8321	21.417
20.0815	18.024
16.4256	21.396
11.8806	5.894
13.5988	16.074
20.3819	20.29
18.6731	20.851
21.0214	18.255
25.0265	23.587
22.2115	9.204
28.3764	24.039
19.8322	15.092
11.934	18.652
30.331	24.492
22.8971	18.146
24.0445	18.016
13.1327	16.838
19.4674	18.13
19.5575	9.992
21.801	9.622
20.9807	15.935
12.2987	18.166
22.121	13.044
22.8528	14.783
21.0053	13.377
36.4709	14.729
22.2797	17.744
13.3942	14.175
21.1963	30.702
29.3051	37.512
23.8603	31.093
11.6065	29.691
17.0224	24.866
16.0484	15.909
10.7919	15.54
22.6227	19.351
22.326	22.043
17.7923	14.689
23.0117	25.222
17.4816	10.928
12.9145	11.39
8.02346	16.428
18.1329	14.641
21.2704	20.181
16.5779	17.353
23.1779	15.902
15.5569	18.294
21.0944	18.536
13.9396	12.002
6.75145	9.273
	10.383
	17.943

## Sheet: h
Diameter vasa recta (um)	Control (Endothelial glycocalyx (Mean fluorescence intensity)			Ischaemia (Endothelial glycocalyx (Mean fluorescence intensity)
9.234	14.6116
17.103	7.86225
9.304	29.4062
9.542	11.2968
10.613	16.5214
10.501	15.3656
12.255	21.3014
10.202	17.8132
11.302	21.6483
6.835	18.8411
10.013	18.3325
9.564	15.4578
11.402	19.9881
13.791	19.7481
13.574	18.6211
8.441	13.1321
8.339	20.5766
9.001	27.4675
8.87	18.2796
10.336	24.567
10.336	29.7065
14.266	29.6196
6.463	20.8299
7.466	13.494
6.183	8.34261
9.461	20.225
8.254	21.5372
8.175	13.8149
10.728	12.6961
12.265	6.52244
9.527		13.2243
16.8775		7.92167
10.9255		10.6554
9.265		20.2076
10.8085		25.7199
10.9175		15.3941
11.729		21.8636
9.7615		20.8019
11.3935		19.8321
7.5485		20.0815
9.819		16.4256
9.32		11.8806
12.529		13.5988
14.4825		20.3819
14.4245		18.6731
9.226		21.0214
9.0585		25.0265
8.8185		22.2115
7.5565		28.3764
10.5725		19.8322
10.5725		11.934
13.6865		30.331
8.24		22.8971
7.937		24.0445
7.6765		13.1327
9.6895		19.4674
8.883		19.5575
7.772		21.801
10.95		20.9807
11.625		12.2987
9.1555			22.121
17.463			22.8528
12.2175			21.0053
6.7865			36.4709
10.5465			22.2797
11.52			13.3942
11.7195			21.1963
8.4835			29.3051
11.2005			23.8603
8.2375			11.6065
9.441			17.0224
9.97			16.0484
12.838			10.7919
14.4765			22.6227
13.8685			22.326
8.938			17.7923
9.7485			23.0117
7.878			17.4816
10.665			8.02346
10.665			18.1329
13.319			21.2704
7.93			16.5779
7.7845			23.1779
8.318			15.5569
9.7865			21.0944
8.6805			13.9396
7.422			6.75145
9.164				15.716
6.414				10.425
6.742				23.094
5.286				15.128
6.815				14.864
9.578				15.227
7.685				20.77
9.834				40.824
8.358				26.84
12.998				16.901
5.299				10.026
6.866				26.132
6.809				16.695
6.945				15.021
3.796				24.176
3.572				11.96
2.41				25.079
10.533				6.747
7.593				20.728
3.802				6.242
3.802				17.263
6.355				23.534
11.235				18.745
7.658				17.795
4.912				14.736
3.878				16.091
5.441				9.076
5.389				3.358
6.289				16.787
6.755				13.525
9.167					10.456
8.395					17.932
6.5935					15.483
6.1595					14.007
7.6475					21.206
8.8825					28.205
7.3285					31.159
8.99					26.076
8.6205					21.417
12.1315					18.024
8.297					21.396
8.722					5.894
7.125					16.074
7.801					20.29
5.546					20.851
6.401					18.255
3.1915					23.587
10.351					9.204
9.3115					24.039
5.039					15.092
5.039					18.652
6.9215					24.492
11.6625					18.146
8.899					18.016
5.503					16.838
4.5175					18.13
5.55					9.992
5					9.622
6.7395					15.935
8.1325					18.166
9.264						13.044
9.376						14.783
6.2035						13.377
6.859						14.729
7.629						17.744
9.005						14.175
9.0205						30.702
8.49						37.512
8.7285						31.093
11.743						29.691
9.443						24.866
8.297						15.909
6.474						15.54
8.3055						19.351
7.5205						22.043
7.963						14.689
4.5645						25.222
9.3925						10.928
9.0515						11.39
5.75						16.428
5.75						14.641
8.142						20.181
12.4915						17.353
8.52						15.902
5.9995						18.294
5.203						18.536
5.4585						12.002
5.6915						9.273
7.6725						10.383
9.035						17.943
