# Supplementary material for: Pericyte-mediated constriction of renal capillaries evokes no-reflow and kidney injury following ischaemia
Source: eLife. 2022 Mar 14;11:e74211. doi: 10.7554/eLife.74211 (PMC8947765; doi:10.7554/eLife.74211)
Supplement: Figure 4—source data 1. [file elife-74211-fig4-data1.xlsx]

## Sheet: Plan1
Figure 4d Descending vasa recta blocked (%)	CONT	ISCH	ISCH+HF		Figure 4e Diameter at block sites (µm)	CONT	ISCH			Figure 4f - Probability distribution	Distance from block to the nearest pericyte soma.		Distance between pericytes				Figure 4g - Descending vasa recta diameter (µm)	CONT			ISCH			ISCH+HF
	10.3448	60	12.5			4.189	4.6295				CONT	ISCH	2.576				Distance from pericyte soma (µm)	0 µm	5 µm	10 µm	0 µm	5 µm	10 µm	0 µm	5 µm	10 µm
	0	90.909	0			7.304	2.9585				8.765	8.814	2.907					8.33	8.8	9.16	6.16	7.83	10.16	8.9	7.92	7.6
	28.57	100	20			7.545	2.335				8.859	7.59	6.159					8.09	8.7	9.5	2.59	1.9	3.34	8.74	10.05	9.65
	0	100	0			6.635	3.1795				9.195	7.082	9.005					8.03	8.66	9.24	4.48	4.9	5.65	10.49	9.18	10.74
	0	66.6667				7.186	3.935				9.361	6.438	10.742					6.82	5.8	6.35	4.24	5.94	7.34	11.29	10.73	10.26
	0	50				6.414	4.1745				10.018	6.132	11.121					5.95	6.04	6.68	6.57	7.84	7.93	7.32	7.16	7.58
	29.4118					6.097					11.566	5.976	11.154					8.82	7.84	7.15	2.68	3.64	4	6.98	8.79	8.17
	11.1111					6.504					12.346	5.976	11.25					6.12	7.53	8.02	4.51	5.97	7.68	7.87	8.15	7.96
	7.69231					6.837					13.91	5.574	11.297					8.2	7.86	8.17	5.4	6.14	7.25	7.05	6.14	7.15
											14.901	5.409	11.325					5.63	6.62	7.32	3.61	4.62	5.95	7.62	7.35	6.28
Number of animals	9	6	4		Number of animals	9	6				15.351	5.146	11.393					7.55	8.77	9.56	3.75	5.68	7.89	7.58	8.1	6.61
											18.042	5.112	11.526					8.73	9.7	9.84	4.71	5.78	7.58	6.91	6.2	6.28
											19.079	5.103	12.096					8.35	8.51	9.14	4.63	5.16	7.02	7.12	7.43	8.16
Mean	9.681	77.93	8.125		Mean	6.523	3.535				19.178	5.083	12.64					7.16	7.03	7.33	2.15	5.87	6.52	7.49	8.26	6.86
Std. Deviation	11.87	21.78	9.869		Std. Deviation	0.9904	0.8562				19.407	5.055	12.855					7.38	8.37	7.65	4.54	5.06	7.15	6.1	6.12	5.57
Std. Error of Mean	3.957	8.89	4.934		Std. Error of Mean	0.3301	0.3496				23.416	5.029	12.925					7.08	7.82	8.05	3.57	5.25	6.29	6.69	6.99	7.5
											26.215	4.995	13.153					7.16	6.5	5.69	4.99	5.74	7.36	5.98	5.63	4.46
												4.959	13.208					6.3	6.82	6.97	4.57	5.92	7.71
												4.849	13.271					6.99	7.43	7.66	5.93	6.63	7.36
												4.819	13.585					6.51	6.38	6.96	6.02	7.03	8.22
												3.922	13.687					6.7	7.72	8.84
												3.882	13.711					5.75	5.8	5.63
												3.475	13.846					10.59	12.32	13.51
												3.411	14.146					11.77	12.56	12.67
												3.179	14.42					9.2	13.28	12.9
												2.035	14.614					7.79	7.5	7.6
												1.705	15.031					7.81	8.7	9.54
												0.852	15.069					7.75	7.36	7.99
													15.362					8.29	7.23	6.22
													15.37					8.43	9.76	9.04
													15.383					5.28	5.63	6.44
													15.542					6.33	5.84	5.99
													15.601
													15.67
													15.898
													16.191
													16.875
													17.009
													17.075
													17.128
													17.341
													17.414
													17.572
													17.672
													17.748
													18.188
													18.427
													18.569
													18.688
													19.178
													19.345
													19.486
													19.573
													19.59
													19.917
													20.075
													20.729
													20.834
													20.893
													20.903
													21.007
													21.662
													21.709
													21.84
													22.142
													22.315
													22.715
													22.847
													22.924
													23.132
													23.177
													23.516
													23.694
													24.06
													24.072
													24.295
													25.091
													25.259
													25.523
													25.655
													25.839
													25.845
													25.869
													26.201
													26.71
													26.878
													26.969
													27.086
													27.628
													27.936
													28.014
													28.282
													28.376
													28.861
													29.198
													29.784
													30.595
													30.738
													30.818
													31.878
													32.775
													34.159
													35.145
													36.215
													36.39
													36.632
													37.591
													38.062
													38.908
													42.21
													42.88
													45.174
													45.973
													46.627
													50.049
													50.707
													55.62
													57.395
