# Supplementary material for: Pericyte-mediated constriction of renal capillaries evokes no-reflow and kidney injury following ischaemia
Source: eLife. 2022 Mar 14;11:e74211. doi: 10.7554/eLife.74211 (PMC8947765; doi:10.7554/eLife.74211)
Supplement: Figure 5—source data 1. [file elife-74211-fig5-data1.xlsx]

## Sheet: Plan1
	Cont (Peritubular capillary diameter - µm)			Isch (Peritubular capillary diameter - µm)
Distance from pericyte (um)	Mean	SEM	N	Mean	SEM	N
0	11.23	0.479	3	6.767	1.059	3
5	11.14	0.4008	3	8.114	1.274	3
10	11	0.4237	3	8.167	1.135	3
15	10.32	0.2306	3	9.572	0.4739	3
