# Supplementary material for: Pericyte-mediated constriction of renal capillaries evokes no-reflow and kidney injury following ischaemia
Source: eLife. 2022 Mar 14;11:e74211. doi: 10.7554/eLife.74211 (PMC8947765; doi:10.7554/eLife.74211)
Supplement: Figure 6—source data 1. [file elife-74211-fig6-data1.xlsx]

## Sheet: Figure 6
Figure 6e Medulla - mean fluorescence intensity (phosphorylated myosin light chain (p-MLC)	CONT	ISCH	ISCH+HF				Figure 6j Cortex - mean fluorescence intensity (phosphorylated myosin light chain (p-MLC)	CONT	ISCH	ISCH+HF
	2.685	31.465	1.501					2.568	12.8	5.09
	1.54	48.78	2.531					4.218	15.5	8.59
	5.442	31.402	4.649					3.354	18.8	1.71
	3.948	39.416	0.946					1.485	14.38	3.21
Number of animals	4	4	4				Number of animals	4	4	4
Mean	3.404	37.77	2.407				Mean	2.906	15.37	4.65
Std. Deviation	1.677	8.251	1.633				Std. Deviation	1.163	2.541	2.968
Std. Error of Mean	0.8387	4.125	0.8164				Std. Error of Mean	0.5813	1.27	1.484
