# Supplementary material for: Pericyte-mediated constriction of renal capillaries evokes no-reflow and kidney injury following ischaemia
Source: eLife. 2022 Mar 14;11:e74211. doi: 10.7554/eLife.74211 (PMC8947765; doi:10.7554/eLife.74211)
Supplement: Figure 7—source data 1. [file elife-74211-fig7-data1.xlsx]

## Sheet: Plan1
CONT	ISCH	ISCH+HF			CONT	ISCH	ISCH+HF
0.148	53.8037	25.703		Number of values	3	3	3
0.025	34.5247	21.77		Mean	0.4062	46.8	23.81
1.0455	52.079	23.945		Std. Deviation	0.5571	10.67	1.97
				Std. Error of Mean	0.3216	6.159	1.137
